# Supplementary material for: Traditional and low-cost technical approaches for investigating greenhouse gases and particulate matter distribution along an urban-to-rural transect (Greve River Basin, Central Italy)
Source: Springer Nature journal article supplement (doi:10.1007/s10653-025-02456-2), 2025-03-27
Supplement: MOESM1 [file 10653_2025_2456_MOESM1_ESM.pdf]

Some photos of the five multiparametric low-cost station locations: Mantignano (MA), San Giusto (SG), Galluzzo (GZ), San Martino (SM), and Lamole (LM)

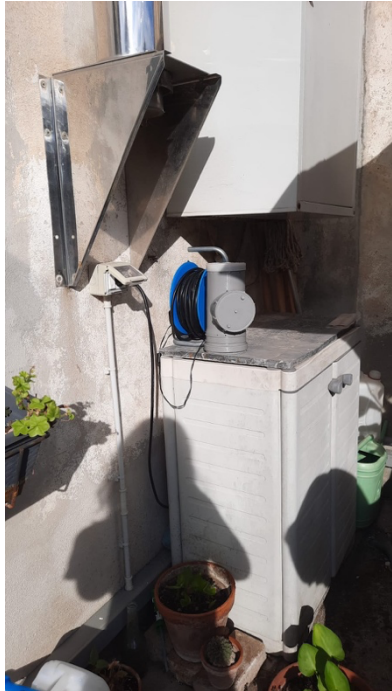

MA

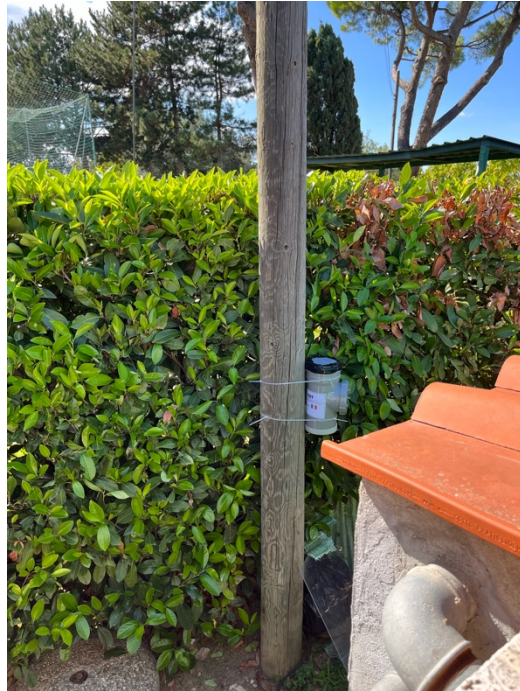

SG

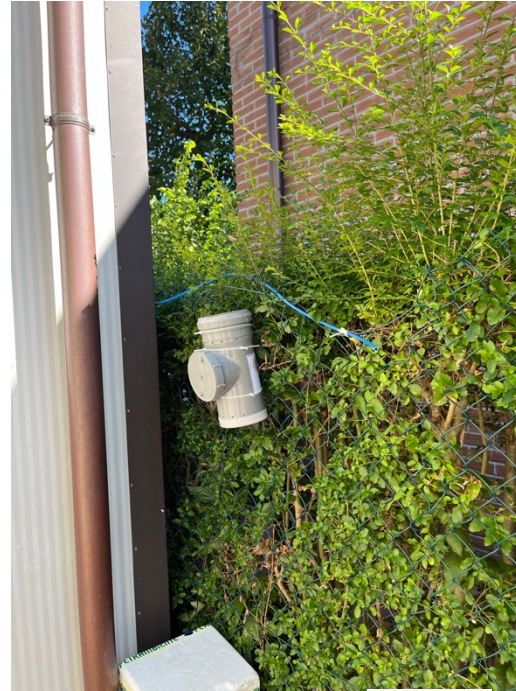

GZ

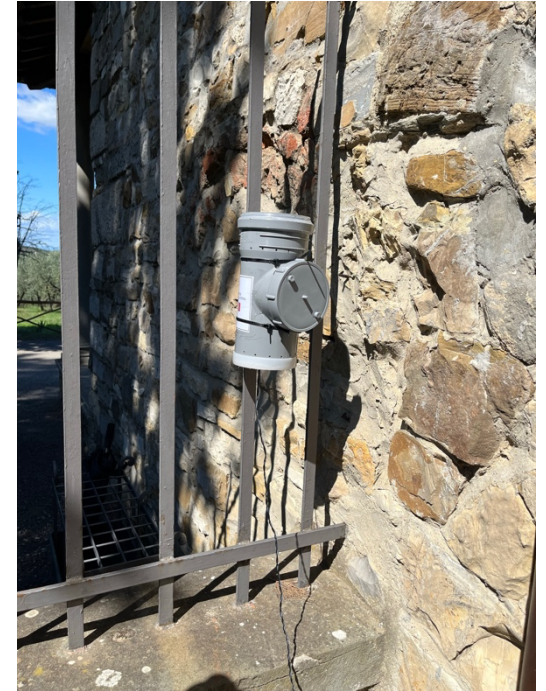

SM

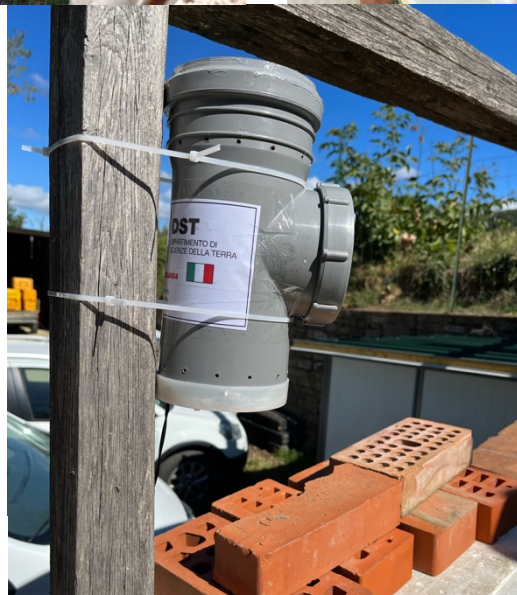

LM
